# Supplementary material for: Three 3d–4f heterometallic complexes constructed from oxalic acid and benzimidazole-5,6-dicarboxylic acid
Source: Royal Society of Chemistry journal article supplement (doi:10.1039/c2ce25859e), 2012-01-01
Supplement: c2ce25859e.pdf [file c2ce25859e.pdf]

Electronic Supplementary Material for CrystEngComm

## **Electronic Supplementary Information (ESI)**

# **Three 3d-4f Heterometallic Complexes Constructed from Oxalic Acid and Benzimidazole-5,6-dicarboxylic Acid**

**Hong-Yu Xu, Fang-Hua Zhao, Yun-Xia Che and Ji-Min Zheng\***

Department of Chemistry, Nankai University, Tianjin 300071, P.R. China

Electronic Supplementary Material for CrystEngComm

**Table S1 Selected Bond Lengths (Å) and Angles (°) for 1-3.**

|                      | <b>1</b>   | <b>2</b>   | <b>3</b>   |
|----------------------|------------|------------|------------|
| Co(1)-N(1)           | 2.117(3)   | 2.112(2)   | 2.115(4)   |
| Co(1)-O(1)           | 2.124(3)   | 2.125(2)   | 2.120(3)   |
| Co(1)-O(2)           | 2.101(2)   | 2.104(2)   | 2.097(3)   |
| Co(2)-N(3)           | 2.144(3)   | 2.147(3)   | 2.148(4)   |
| Co(2)-O(3)           | 2.100(2)   | 2.097(2)   | 2.096(3)   |
| Co(2)-O(4)           | 2.106(3)   | 2.106(2)   | 2.105(3)   |
| Co(2)-O(5)           | 2.018(2)   | 2.017(2)   | 2.008(3)   |
| Co(2)-O(9)           | 2.080(2)   | 2.079(2)   | 2.078(3)   |
| Co(2)-O(13)          | 2.186(3)   | 2.187(2)   | 2.184(4)   |
| Ln(1)-O(6)           | 2.347(2)   | 2.338(2)   | 2.306(3)   |
| Ln(1)-O(7)#1         | 2.366(2)   | 2.355(2)   | 2.346(3)   |
| Ln(1)-O(8)#10        | 2.398(2)   | 2.381(2)   | 2.321(3)   |
| Ln(1)-O(10)          | 2.619(2)   | 2.603(2)   | 2.578(3)   |
| Ln(1)-O(10)#1        | 2.530(2)   | 2.519(2)   | 2.516(3)   |
| Ln(1)-O(11)          | 2.444(2)   | 2.430(2)   | 2.400(3)   |
| Ln(1)-O(11)#8        | 2.653(2)   | 2.641(2)   | 2.628(3)   |
| Ln(1)-O(12)#8        | 2.444(2)   | 2.428(2)   | 2.397(3)   |
| O(2)#2-Co(1)-O(2)    | 180.000(2) | 180.000(1) | 180.00(17) |
| O(2)-Co(1)-N(1)#3    | 84.31(10)  | 84.44(9)   | 84.72(14)  |
| O(2)-Co(1)-N(1)#4    | 95.69(10)  | 95.56(9)   | 95.28(14)  |
| N(1)#3-Co(1)-N(1)#4  | 180.000(1) | 180.000(1) | 180.0(2)   |
| O(2)-Co(1)-O(1)#2    | 100.23(10) | 100.23(9)  | 100.23(13) |
| N(1)#3-Co(1)-O(1)#2  | 94.00(11)  | 94.46(9)   | 94.68(14)  |
| N(1)#4-Co(1)-O(1)#2  | 86.00(11)  | 85.54(9)   | 85.32(14)  |
| O(2)-Co(1)-O(1)      | 79.77(10)  | 79.77(9)   | 79.77(13)  |
| O(1)#2-Co(1)-O(1)    | 180.000(1) | 180.000(1) | 180.00(8)  |
| O(5)-Co(2)-O(9)      | 108.69(10) | 108.25(9)  | 107.54(13) |
| O(5)-Co(2)-O(3)      | 162.33(10) | 162.46(9)  | 162.88(13) |
| O(9)-Co(2)-O(3)      | 88.37(10)  | 88.71(9)   | 89.02(13)  |
| O(5)-Co(2)-O(4)      | 83.74(10)  | 83.89(9)   | 84.29(13)  |
| O(9)-Co(2)-O(4)      | 165.92(10) | 166.21(9)  | 166.69(15) |
| O(3)-Co(2)-O(4)      | 78.80(10)  | 78.77(9)   | 78.80(13)  |
| O(5)-Co(2)-N(3)#5    | 90.75(10)  | 91.00(9)   | 91.14(14)  |
| O(9)-Co(2)-N(3)#5    | 91.31(11)  | 91.18(10)  | 90.79(14)  |
| O(3)-Co(2)-N(3)#5    | 93.51(11)  | 93.15(9)   | 92.99(14)  |
| O(4)-Co(2)-N(3)#5    | 95.22(11)  | 95.22(10)  | 95.16(15)  |
| O(5)-Co(2)-O(13)     | 89.98(10)  | 89.81(9)   | 90.04(14)  |
| O(9)-Co(2)-O(13)     | 85.89(10)  | 85.95(9)   | 85.81(14)  |
| O(3)-Co(2)-O(13)     | 86.60(10)  | 86.88(9)   | 86.79(14)  |
| O(4)-Co(2)-O(13)     | 87.55(11)  | 87.62(10)  | 88.13(14)  |
| N(3)#5-Co(2)-O(13)   | 177.20(11) | 177.12(10) | 176.60(14) |
| O(6)-Ln(1)-O(7)#1    | 139.64(8)  | 139.72(7)  | 140.51(11) |
| O(6)-Ln(1)-O(8)#10   | 69.27(8)   | 69.36(8)   | 69.63(11)  |
| O(7)#1-Ln(1)-O(8)#10 | 149.31(8)  | 149.19(8)  | 148.23(11) |
| O(6)-Ln(1)-O(12)#8   | 84.48(9)   | 84.48(8)   | 84.23(11)  |
| O(7)#1-Ln(1)-O(12)#8 | 94.19(9)   | 94.42(8)   | 94.85(12)  |

Electronic Supplementary Material for CrystEngComm

|                       |           |           |            |
|-----------------------|-----------|-----------|------------|
| O(8)#10-Ln(1)-O(12)#8 | 100.11(9) | 99.65(8)  | 99.20(12)  |
| O(6)-Ln(1)-O(11)      | 116.11(8) | 116.12(7) | 116.36(11) |
| O(7)#1-Ln(1)-O(11)    | 76.48(8)  | 76.47(8)  | 76.20(11)  |
| O(8)#10-Ln(1)-O(11)   | 80.05(9)  | 80.08(8)  | 79.82(11)  |
| O(12)#8-Ln(1)-O(11)   | 157.29(8) | 157.11(7) | 156.81(11) |
| O(6)-Ln(1)-O(10)#1    | 136.57(8) | 136.83(7) | 136.91(10) |
| O(7)#1-Ln(1)-O(10)#1  | 82.56(8)  | 82.28(7)  | 81.36(11)  |
| O(8)#10-Ln(1)-O(10)#1 | 72.84(8)  | 72.79(7)  | 72.72(11)  |
| O(12)#8-Ln(1)-O(10)#1 | 81.97(8)  | 82.09(7)  | 81.80(10)  |
| O(11)-Ln(1)-O(10)#1   | 76.36(7)  | 75.94(6)  | 75.77(10)  |
| O(6)-Ln(1)-O(10)      | 74.17(8)  | 73.88(7)  | 73.79(10)  |
| O(7)#1-Ln(1)-O(10)    | 72.58(8)  | 72.78(7)  | 73.52(11)  |
| O(8)#10-Ln(1)-O(10)   | 119.98(8) | 120.26(7) | 120.44(11) |
| O(12)#8-Ln(1)-O(10)   | 121.98(7) | 121.90(6) | 122.07(10) |
| O(11)-Ln(1)-O(10)     | 75.44(7)  | 75.94(6)  | 76.42(10)  |
| O(10)#1-Ln(1)-O(10)   | 145.93(4) | 145.95(4) | 146.12(6)  |
| O(6)-Ln(1)-O(11)#8    | 74.48(8)  | 74.52(7)  | 74.84(11)  |
| O(7)#1-Ln(1)-O(11)#8  | 73.71(8)  | 73.75(7)  | 74.00(10)  |
| O(8)#10-Ln(1)-O(11)#8 | 135.61(8) | 135.61(7) | 136.10(10) |
| O(12)#8-Ln(1)-O(11)#8 | 50.92(7)  | 51.22(6)  | 51.59(10)  |
| O(11)-Ln(1)-O(11)#8   | 140.53(5) | 140.60(4) | 140.65(7)  |
| O(10)#1-Ln(1)-O(11)#8 | 123.78(7) | 123.93(6) | 123.50(10) |
| O(10)-Ln(1)-O(11)#8   | 71.36(7)  | 71.02(6)  | 70.91(9)   |

Symmetry transformations used to generate equivalent atoms: For **1** and **2** #1 -x+1, y-1/2, -z+3/2; #2 -x, -y+1, -z+2; #3 x-1, y, z; #4 -x+1, -y+1, -z+2; #5 -x, y+1/2, -z+3/2; #8 -x+1, y+1/2, -z+3/2; #10 x, y-1, z; For **3** #1 x, y+1, z; #2 -x+2, -y+1, -z; #3 -x+1, -y+1, -z; #4 x+1, y, z; #5 -x+2, y-1/2, -z+1/2; #8 -x+1, y-1/2, -z+1/2; #10 -x+1, y+1/2, -z+1/2.

**Table S2.** Hydrogen bond lengths (Å) and bond angles (°) for complexes **1-3**

|                         | D-H...A                | d(D-H) | d(H...A) | d(D...A) | ∠(D-H...A) |
|-------------------------|------------------------|--------|----------|----------|------------|
| <b>1</b>                | N(2)-H(2)...O(1)#11    | 0.88   | 2.04     | 2.814(4) | 145.8      |
|                         | N(2)-H(2)...O(16)#11   | 0.88   | 2.54     | 3.043(6) | 117.3      |
|                         | N(4)-H(4)...O(3)#5     | 0.88   | 2.32     | 3.017(4) | 136.7      |
|                         | N(4)-H(4)...O(9)#5     | 0.88   | 2.55     | 3.335(4) | 149.6      |
|                         | O(13)-H(13A)...O(8)#10 | 0.85   | 2.13     | 2.967(4) | 169.7      |
|                         | O(13)-H(13A)...O(6)    | 0.85   | 2.56     | 3.064(4) | 119        |
|                         | O(13)-H(13B)...O(15)   | 0.85   | 2.05     | 2.852(6) | 158.7      |
|                         | O(14)-H(14A)...O(5)    | 0.85   | 2.00     | 2.852(5) | 176.4      |
|                         | O(14)-H(14A)...O(4)    | 0.85   | 2.64     | 3.052(5) | 110.9      |
|                         | O(14)-H(14B)...O(15)#4 | 0.85   | 2.25     | 2.915(8) | 135        |
|                         | O(14)-H(14B)...O(16)#4 | 0.85   | 2.54     | 3.095(8) | 123.7      |
|                         | O(15)-H(15B)...O(2)#4  | 0.85   | 2.38     | 2.922(6) | 121.7      |
|                         | O(16)-H(16B)...O(14)#4 | 0.85   | 2.38     | 3.095(8) | 141        |
| O(16)-H(16B)...O(14)#10 | 0.85                   | 2.39   | 2.995(8) | 127.9    |            |
| <b>2</b>                | N(2)-H(2)...O(1)#12    | 0.88   | 2.04     | 2.810(3) | 145.8      |
|                         | N(2)-H(2)...O(16)#6    | 0.88   | 2.53     | 3.038(5) | 117.2      |
|                         | N(4)-H(4)...O(3)#5     | 0.88   | 2.3      | 3.005(3) | 136.9      |
|                         | N(4)-H(4)...O(9)#5     | 0.88   | 2.55     | 3.331(3) | 148.9      |
|                         | O(13)-H(13B)...O(6)    | 0.85   | 2.56     | 3.063(3) | 119.4      |
|                         | O(13)-H(13B)...O(8)#8  | 0.85   | 2.13     | 2.972(3) | 169.3      |
|                         | O(13)-H(13A)...O(15)#8 | 0.85   | 2.04     | 2.869(6) | 165.3      |

Electronic Supplementary Material for CrystEngComm

|   |                         |      |      |           |       |
|---|-------------------------|------|------|-----------|-------|
|   | O(14)-H(14A)...O(4)     | 0.85 | 2.57 | 3.040(4)  | 115.8 |
|   | O(14)-H(14A)...O(5)     | 0.85 | 2.04 | 2.847(4)  | 158.2 |
|   | O(14)-H(14B)...O(16)#11 | 0.85 | 2.29 | 3.131(7)  | 169.9 |
|   | O(15)-H(15A)...O(2)#11  | 0.85 | 2.41 | 2.921(5)  | 119.4 |
|   | O(16)-H(16A)...O(14)    | 0.86 | 2.15 | 2.988(6)  | 168.1 |
|   | O(16)-H(16B)...O(2)#10  | 0.85 | 2.56 | 3.278(5)  | 143   |
| 3 | N(2)-H(2)...O(1)#11     | 0.88 | 2    | 2.785(6)  | 147.6 |
|   | N(2)-H(2)...O(14)#11    | 0.88 | 2.62 | 3.105(9)  | 115.6 |
|   | N(4)-H(4)...O(3)#5      | 0.88 | 2.31 | 3.004(6)  | 135.6 |
|   | N(4)-H(4)...O(9)#5      | 0.88 | 2.52 | 3.314(6)  | 149.8 |
|   | O(13)-H(13A)...O(16)    | 0.85 | 2.08 | 2.832(8)  | 147.4 |
|   | O(13)-H(13B)...O(7)#10  | 0.85 | 2.17 | 2.986(5)  | 162   |
|   | O(13)-H(13B)...O(6)     | 0.85 | 2.47 | 3.066(5)  | 127.8 |
|   | O(15)-H(15A)...O(14)#12 | 0.85 | 2.17 | 3.017(11) | 172.4 |
|   | O(15)-H(15B)...O(14)#9  | 0.85 | 2.22 | 2.992(11) | 151.7 |
|   | O(16)-H(16A)...O(2)#3   | 0.85 | 2.18 | 2.906(9)  | 142.9 |
|   | O(16)-H(16B)...O(15)#13 | 0.85 | 2.35 | 2.935(12) | 126.5 |

Symmetry code: for **1**, #4 -x+1, -y+1, -z+2; #5 -x, y+1/2, -z+3/2; #11 x+1, y+1, z; for **2**, #5 -x, y+1/2, -z+3/2; #6 x+1, y, z; #8 x, y-1, z; #10 x, y+1, z; #11 -x+1, -y+1, -z+2; #12 x+1, y+1, z; for **3**, #3 -x+1, -y+1, -z; #5 -x+2, y-1/2, -z+1/2; #9 -x+1, y-1/2, -z+1/2; #10 x, y+1, z; #11 x-1, y-1, z; #12 x, -y+3/2, z+1/2; #13 x, -y+3/2, z-1/2.

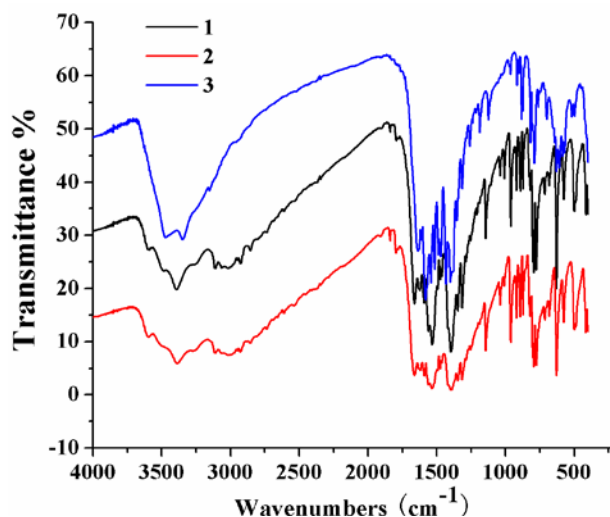

**Fig. S1.** The IR spectra of **1-3**.

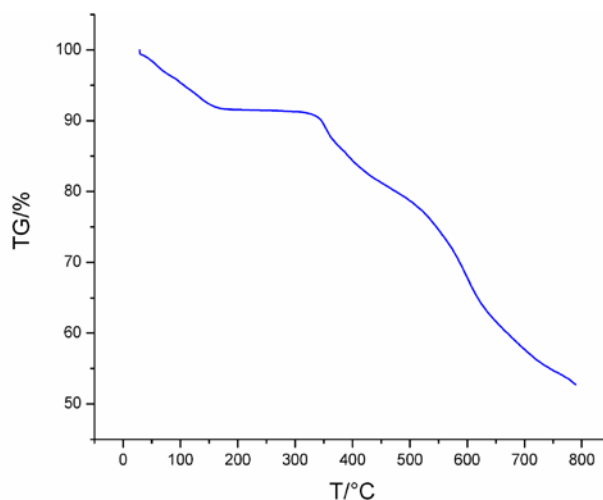

**Fig. S2.** TG curve of **3**.

Electronic Supplementary Material for CrystEngComm

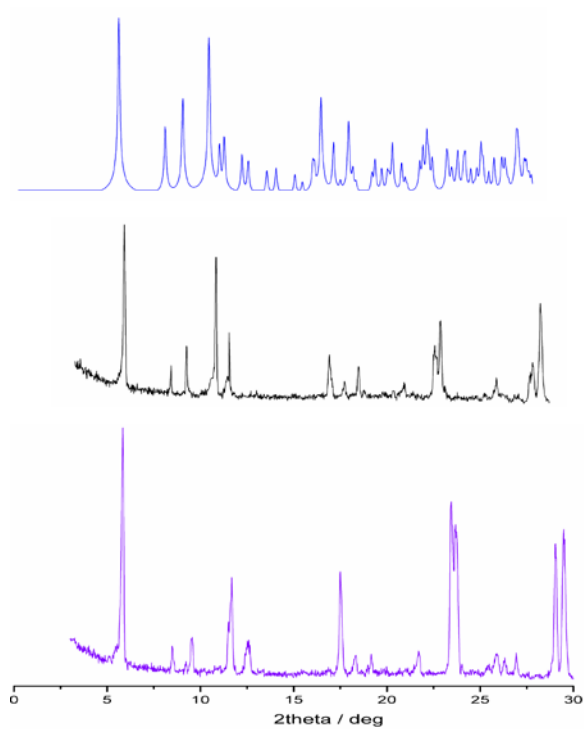

(a)

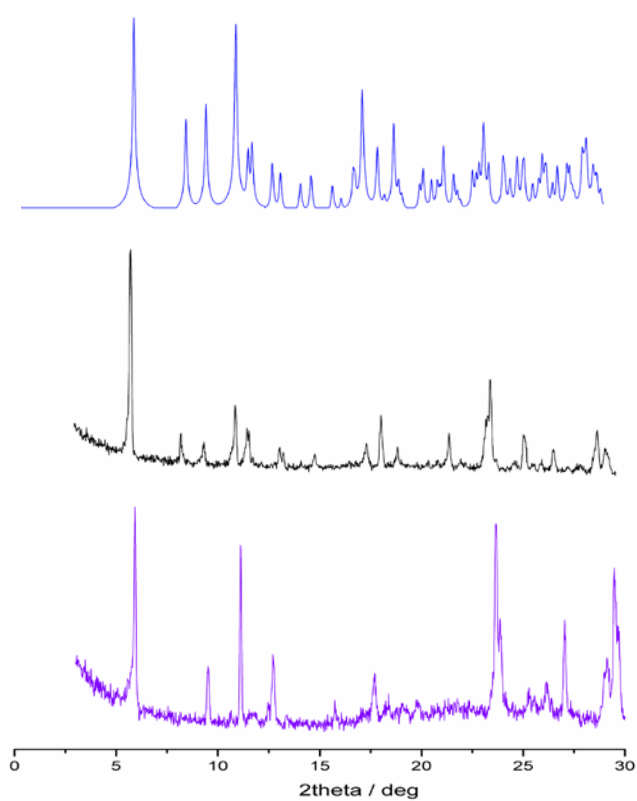

(b)

Electronic Supplementary Material for CrystEngComm

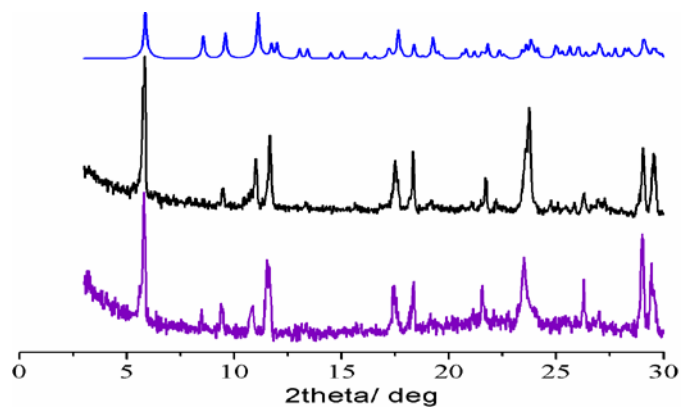

(c)

**Fig. S3** Powder XRD plots of (a) **1**, (b) **2**, (c) **3**: comparison of the XRD plots at room temperature (black), 180°C (dehydration, violet) with the simulation pattern (blue).

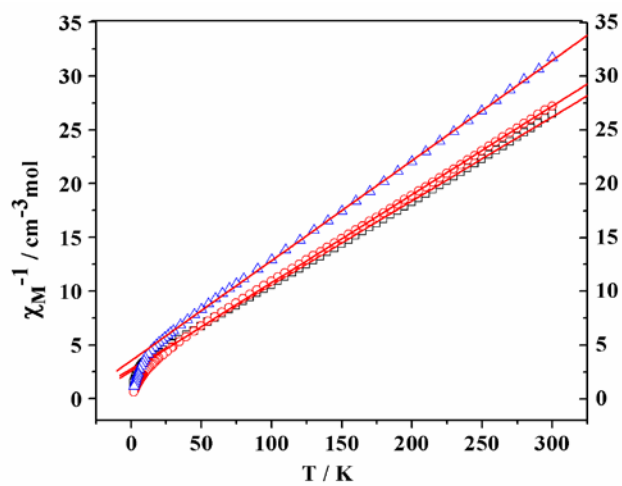

**Fig. S4**  $\chi_M^{-1}$  vs  $T$  curves for complexes **1** (black), **2** (red) and **3** (blue).
